# Supplementary material
Source: Springer Nature journal article supplement (https://www.springermedizin.de/resource/supplementary/12958_2008_480_MOESM5_ESM.pdf/9568286)

UPON SECRETION AND IN CIRCULATION

IN URINE

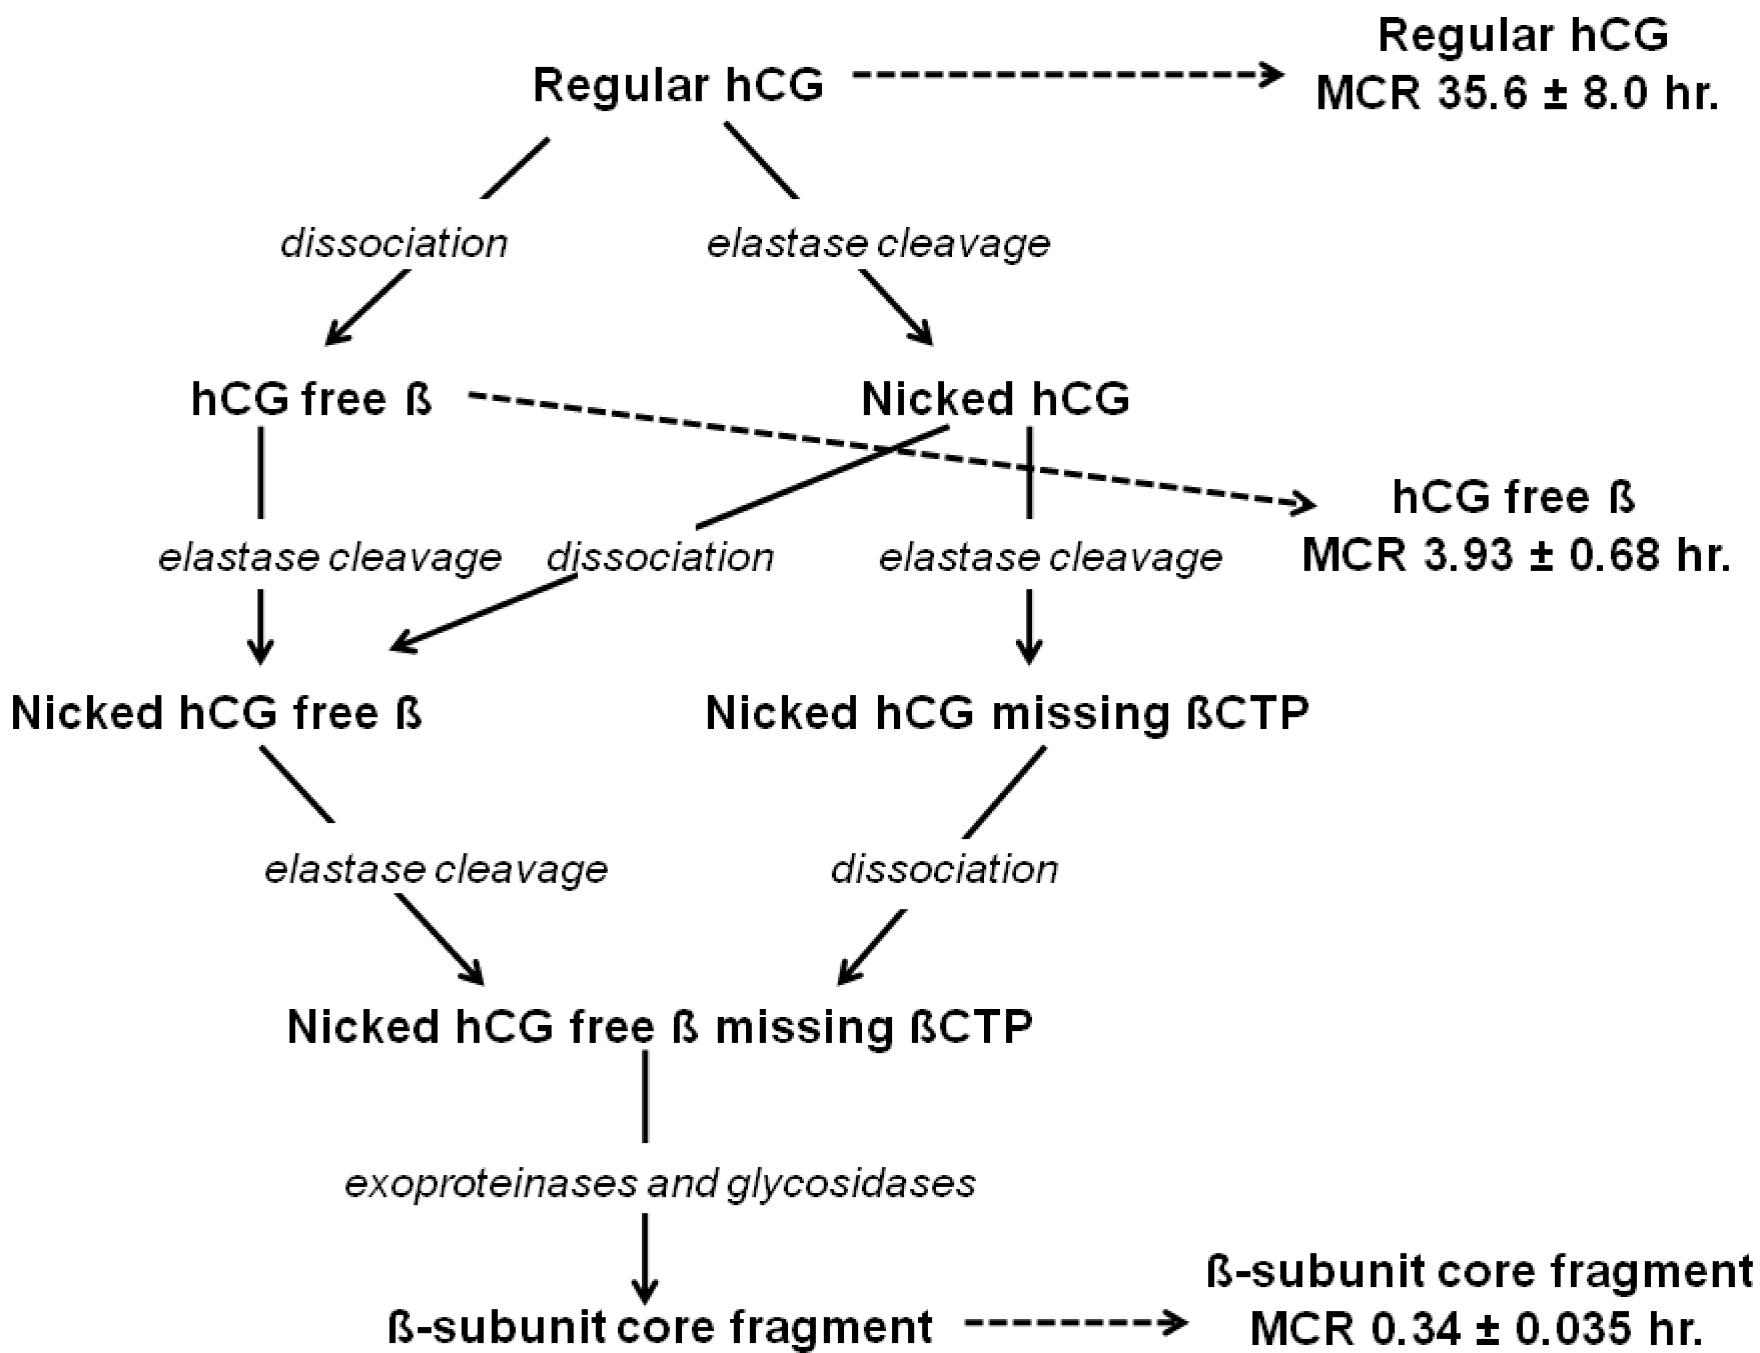

Supplement: MOESM5 [file 9568286]
